# Supplementary material
Source: publisher figshare collection journal article supplement (https://acs.figshare.com/ndownloader/files/5786688)

Supporting Information for:

" The Synthesis of Azapeptidomimetic  $\beta$ -Lactam  
Molecules as Potential Protease Inhibitors"

*William P. Malachowski,\* Chenyang Tie, Katherine Wang, and Robert L. Broadrup*

Table of Contents

| <u>Page:</u> | <u>Item</u>                                        |
|--------------|----------------------------------------------------|
| S3           | $^1\text{H}$ NMR spectrum of compound <b>7</b>     |
| S4           | $^{13}\text{C}$ NMR spectrum of compound <b>7</b>  |
| S5           | $^1\text{H}$ NMR spectrum of compound <b>8</b>     |
| S6           | $^{13}\text{C}$ NMR spectrum of compound <b>8</b>  |
| S7           | $^1\text{H}$ NMR spectrum of compound <b>9</b>     |
| S8           | $^{13}\text{C}$ NMR spectrum of compound <b>9</b>  |
| S9           | $^1\text{H}$ NMR spectrum of compound <b>10</b>    |
| S10          | $^{13}\text{C}$ NMR spectrum of compound <b>10</b> |
| S11          | $^1\text{H}$ NMR spectrum of compound <b>12</b>    |
| S12          | $^{13}\text{C}$ NMR spectrum of compound <b>12</b> |
| S13          | $^1\text{H}$ NMR spectrum of compound <b>14</b>    |
| S14          | $^{13}\text{C}$ NMR spectrum of compound <b>14</b> |
| S15          | $^1\text{H}$ NMR spectrum of compound <b>16</b>    |
| S16          | $^{13}\text{C}$ NMR spectrum of compound <b>16</b> |
| S17          | $^1\text{H}$ NMR spectrum of compound <b>18</b>    |
| S18          | $^{13}\text{C}$ NMR spectrum of compound <b>18</b> |

|     |                                                    |
|-----|----------------------------------------------------|
| S19 | $^1\text{H}$ NMR spectrum of compound <b>20</b>    |
| S20 | $^{13}\text{C}$ NMR spectrum of compound <b>20</b> |
| S21 | $^1\text{H}$ NMR spectrum of compound <b>21</b>    |
| S22 | $^{13}\text{C}$ NMR spectrum of compound <b>21</b> |
| S23 | $^1\text{H}$ NMR spectrum of compound <b>27</b>    |
| S24 | $^{13}\text{C}$ NMR spectrum of compound <b>27</b> |
| S25 | $^1\text{H}$ NMR spectrum of compound <b>28</b>    |
| S26 | $^{13}\text{C}$ NMR spectrum of compound <b>28</b> |
| S27 | $^1\text{H}$ NMR spectrum of compound <b>29</b>    |
| S28 | $^{13}\text{C}$ NMR spectrum of compound <b>29</b> |
| S29 | $^1\text{H}$ NMR spectrum of compound <b>26</b>    |
| S30 | $^{13}\text{C}$ NMR spectrum of compound <b>26</b> |





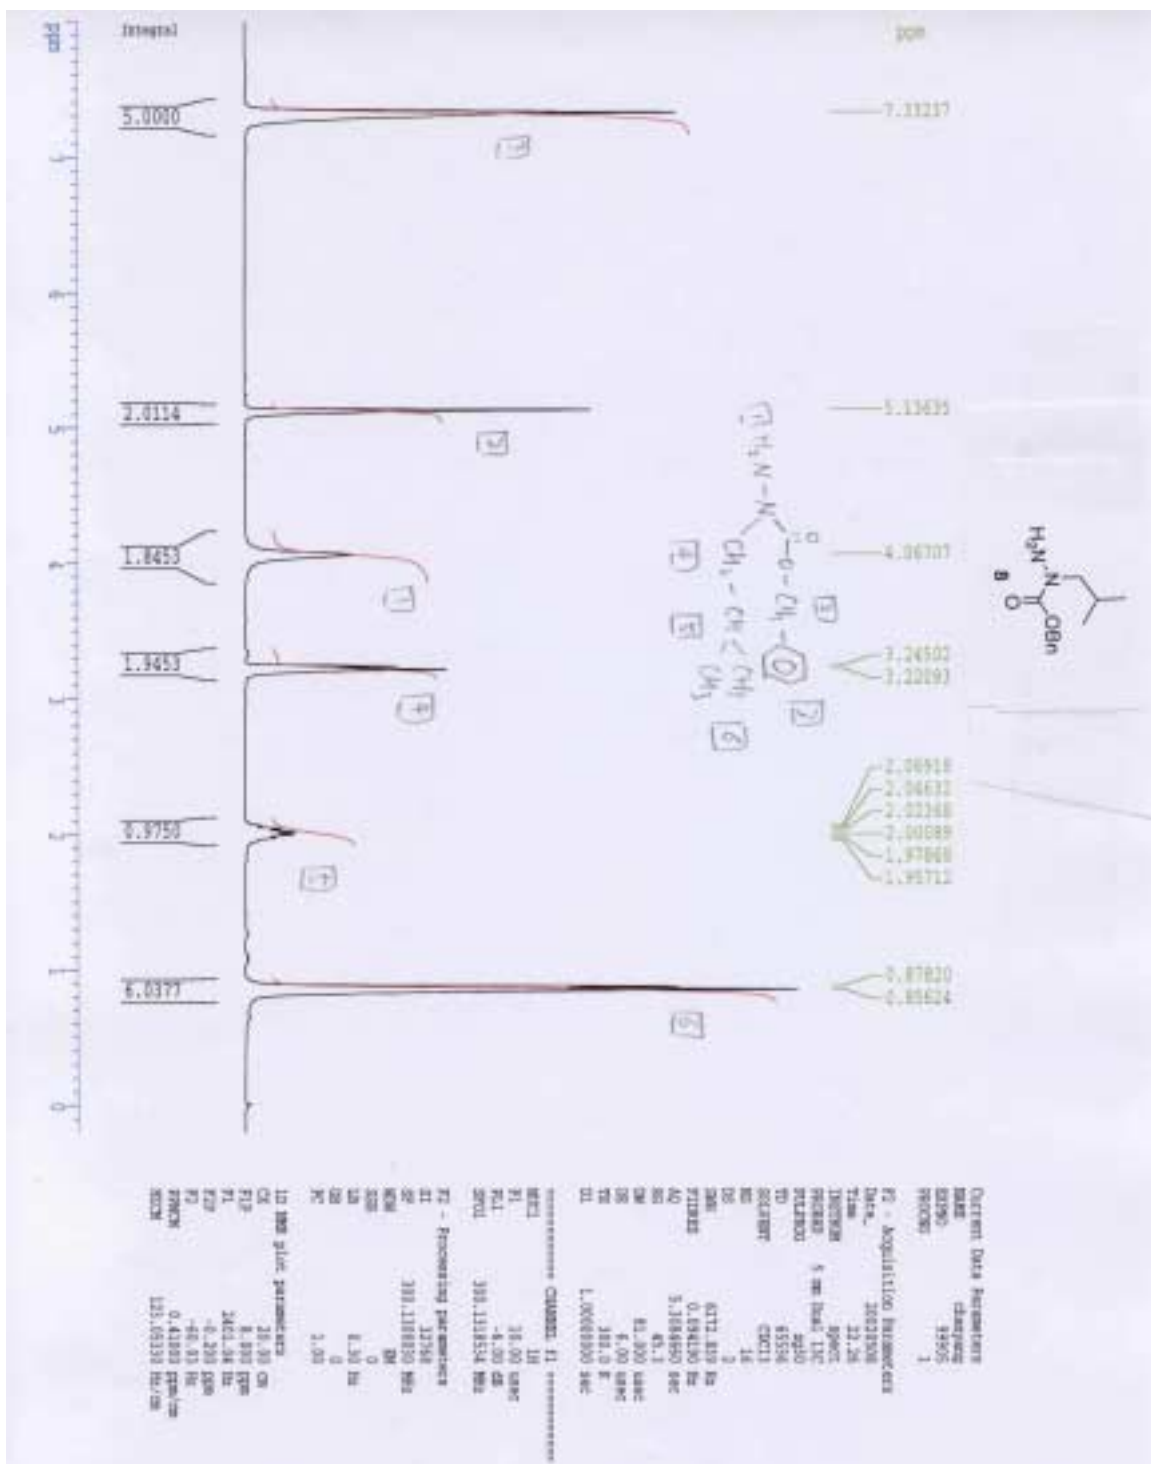

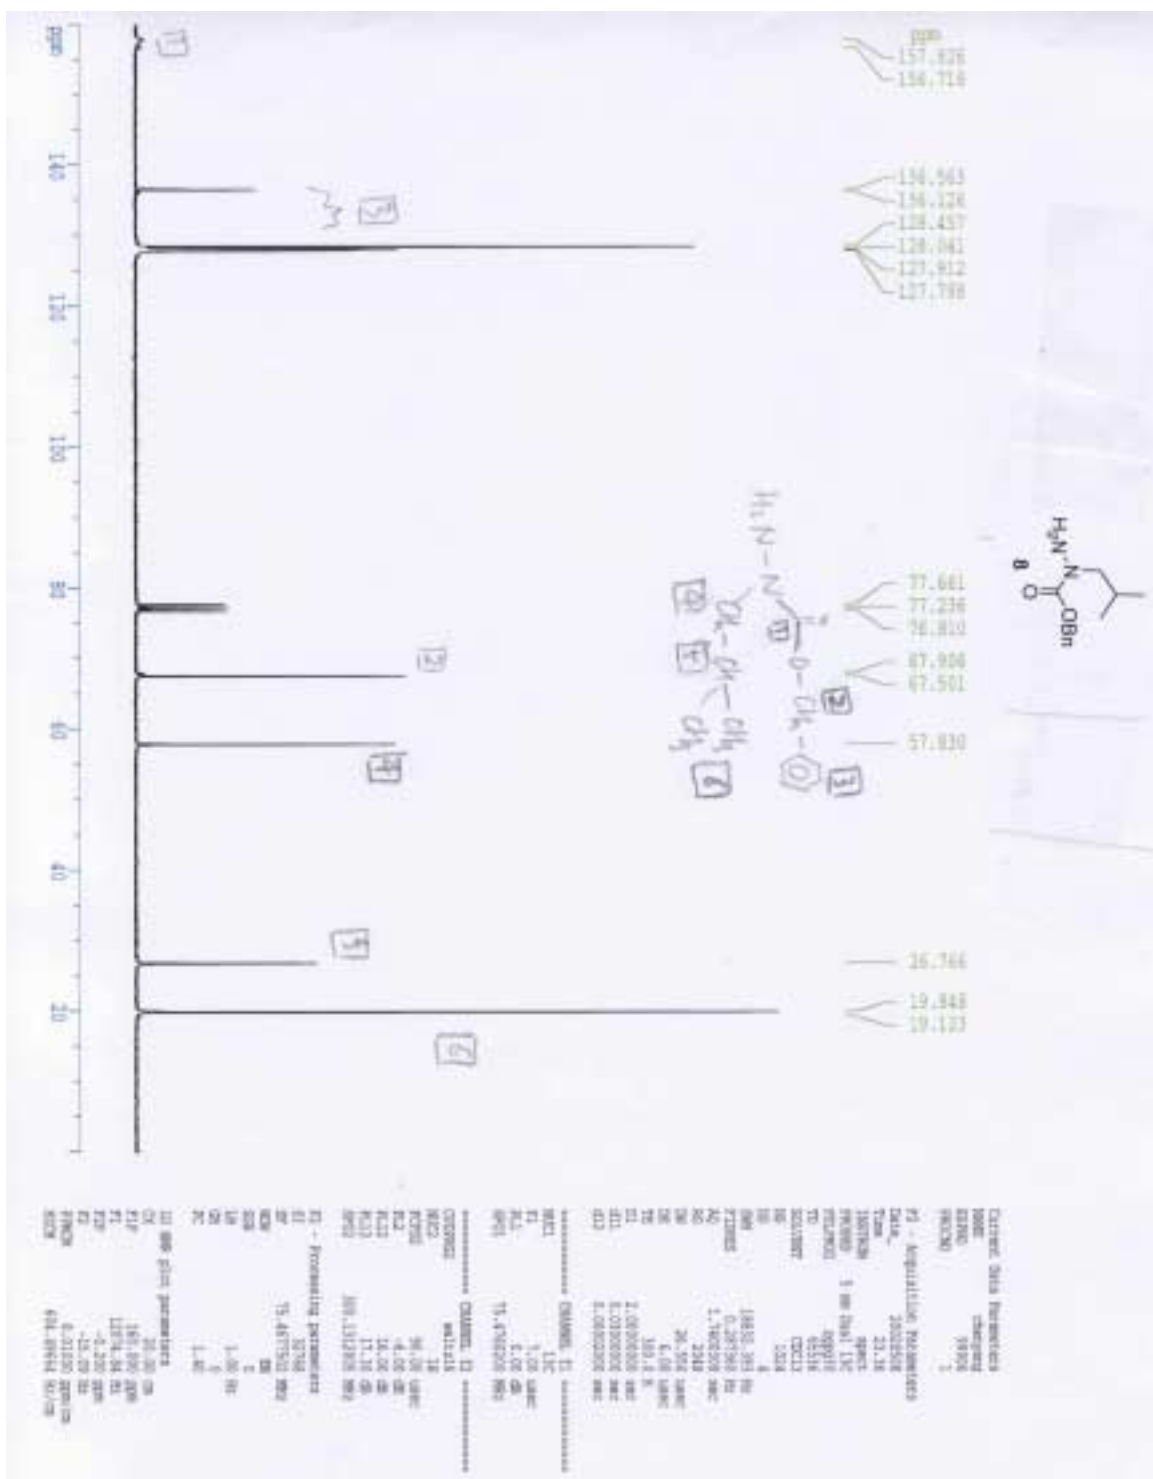







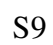



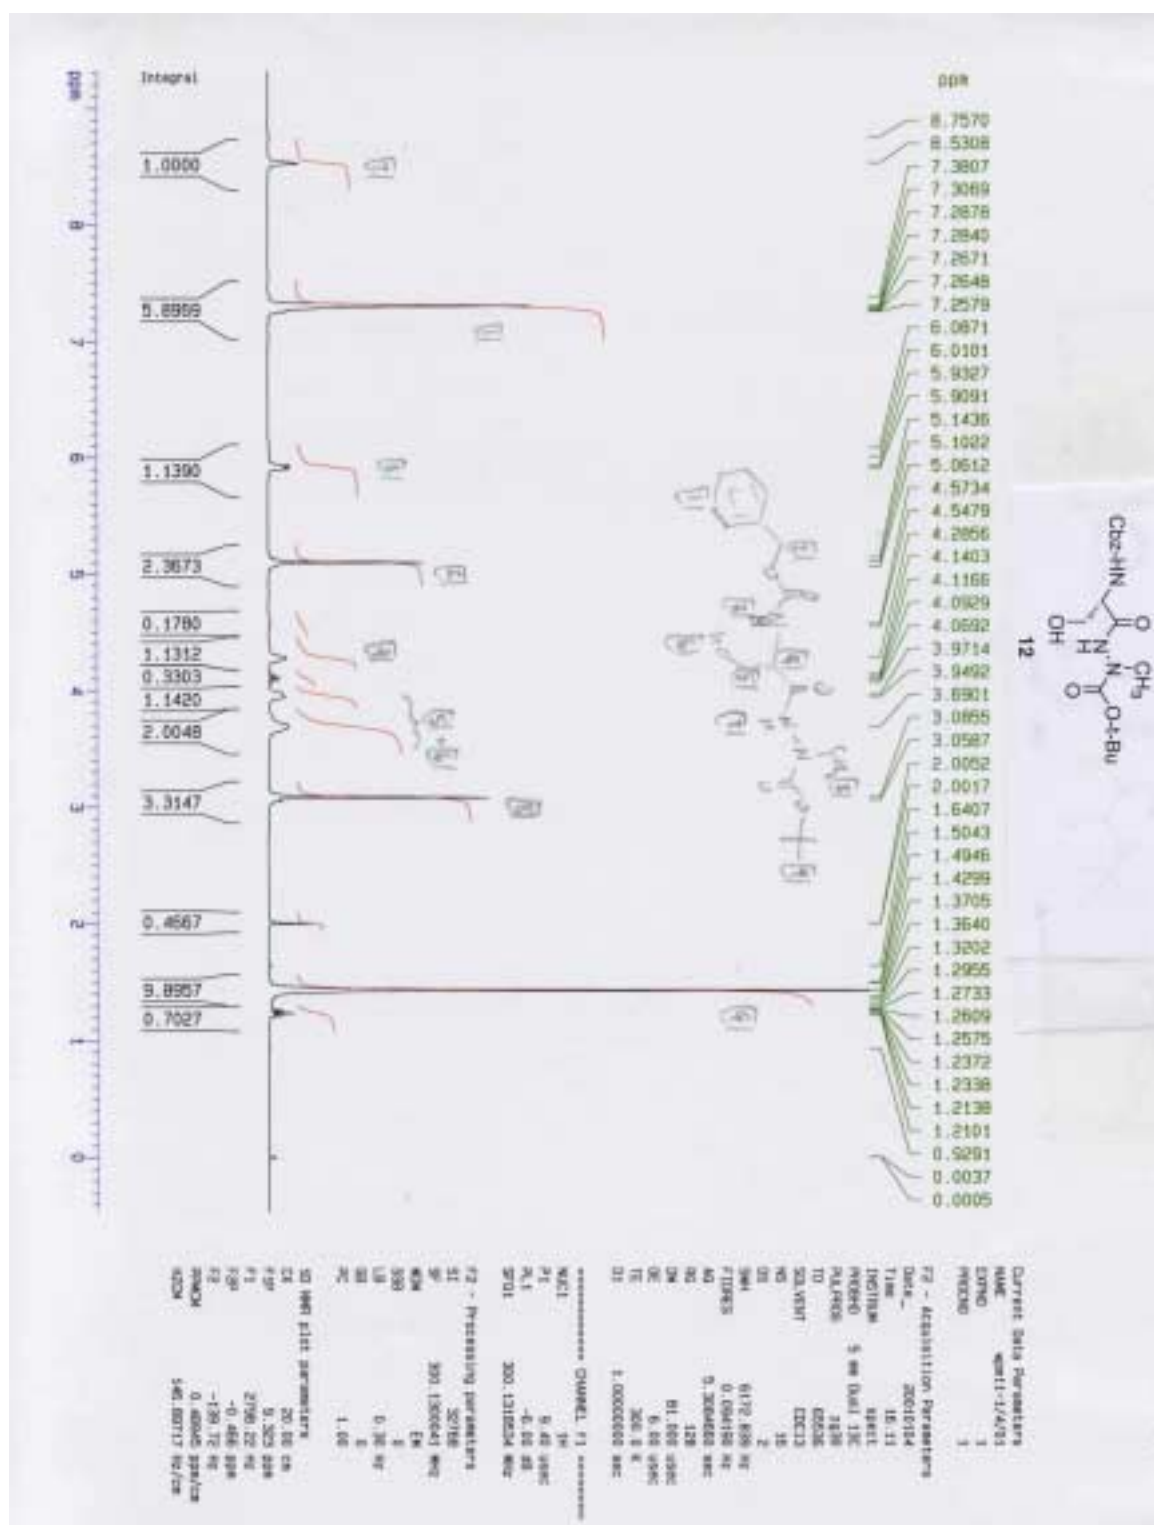











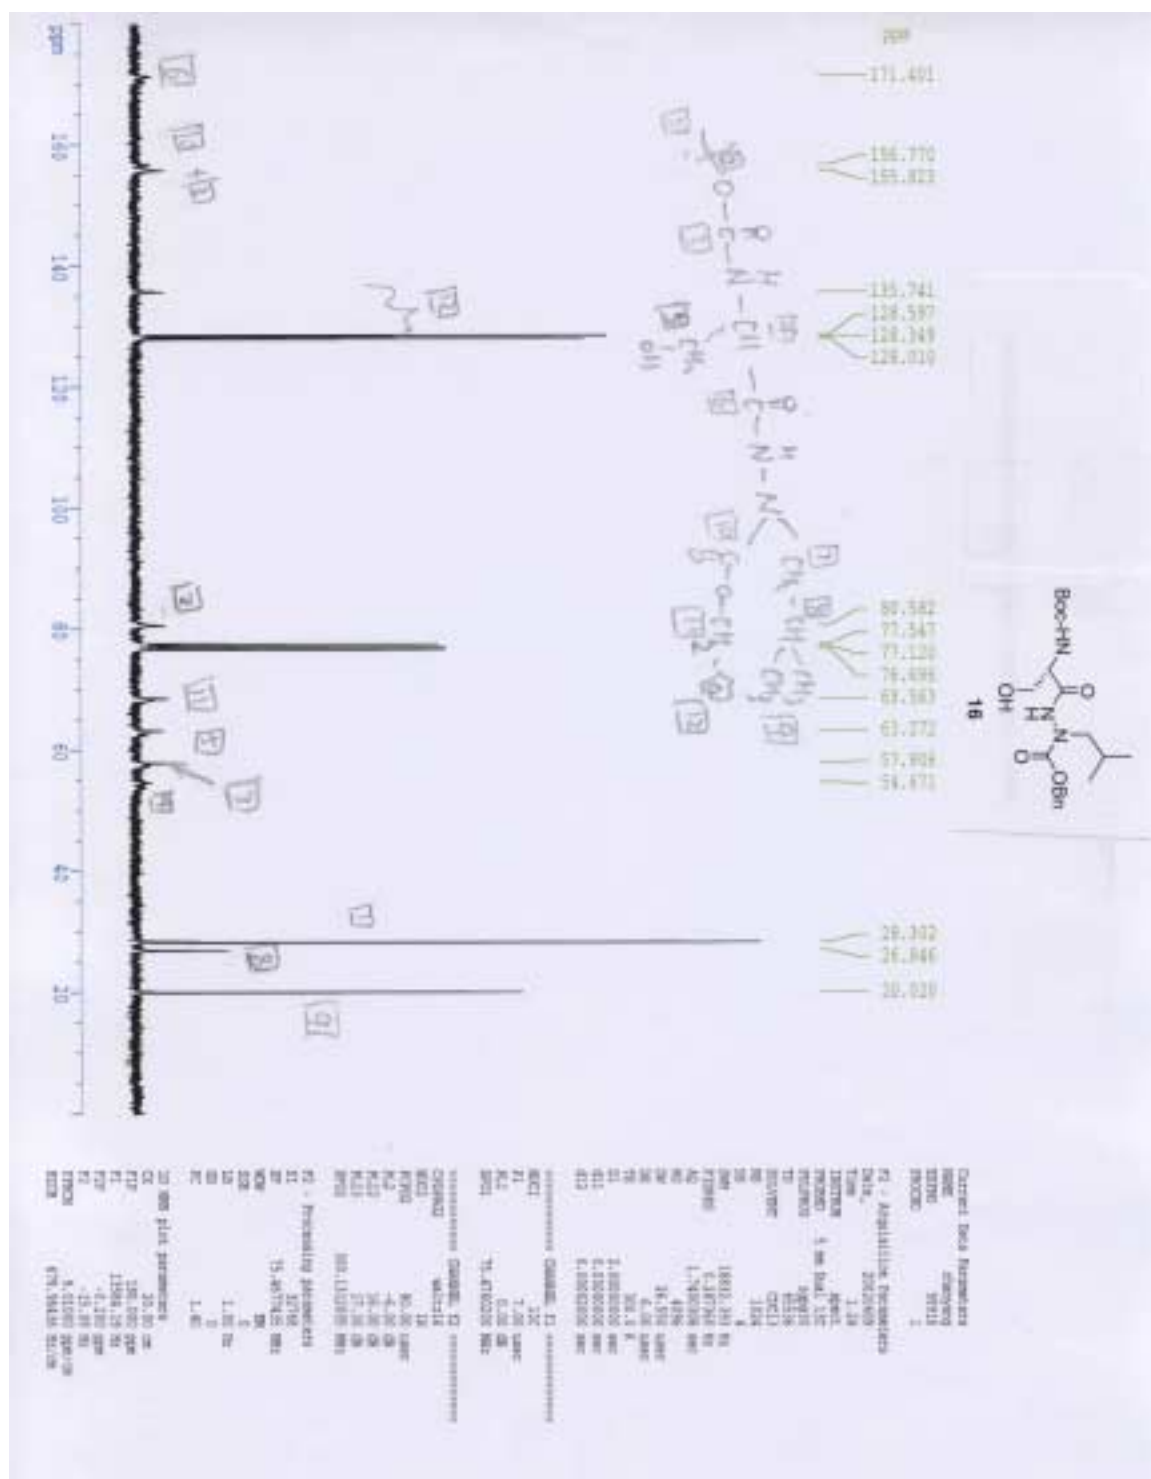





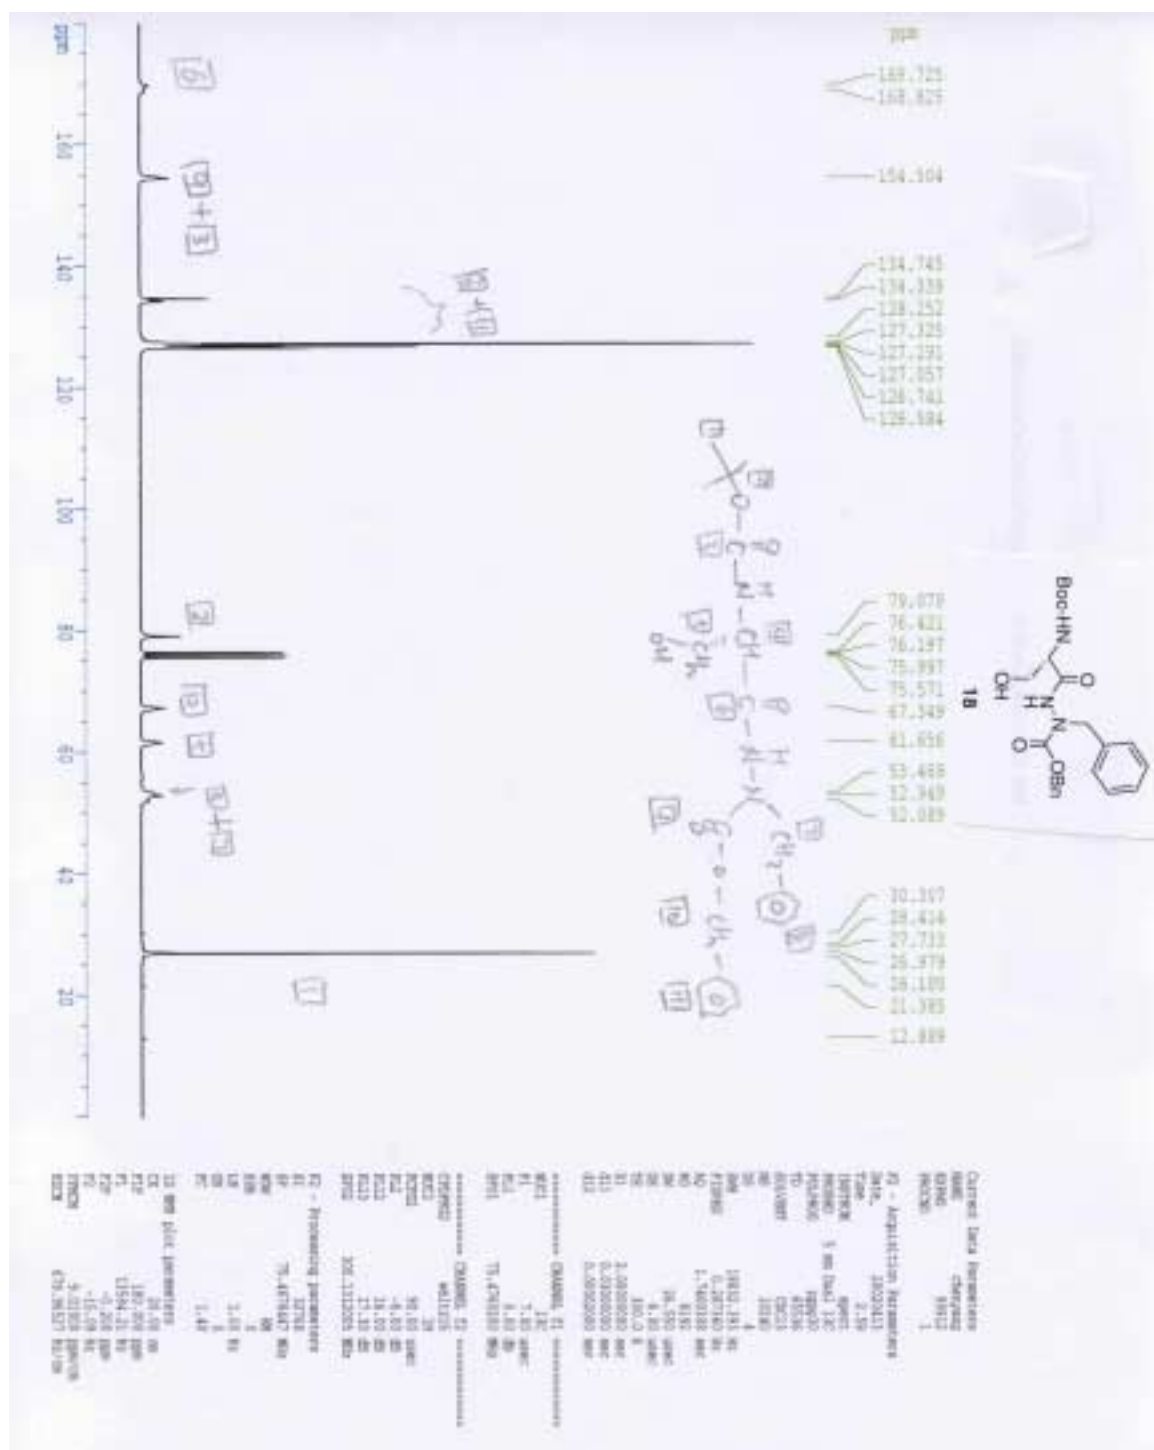

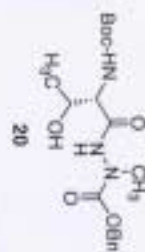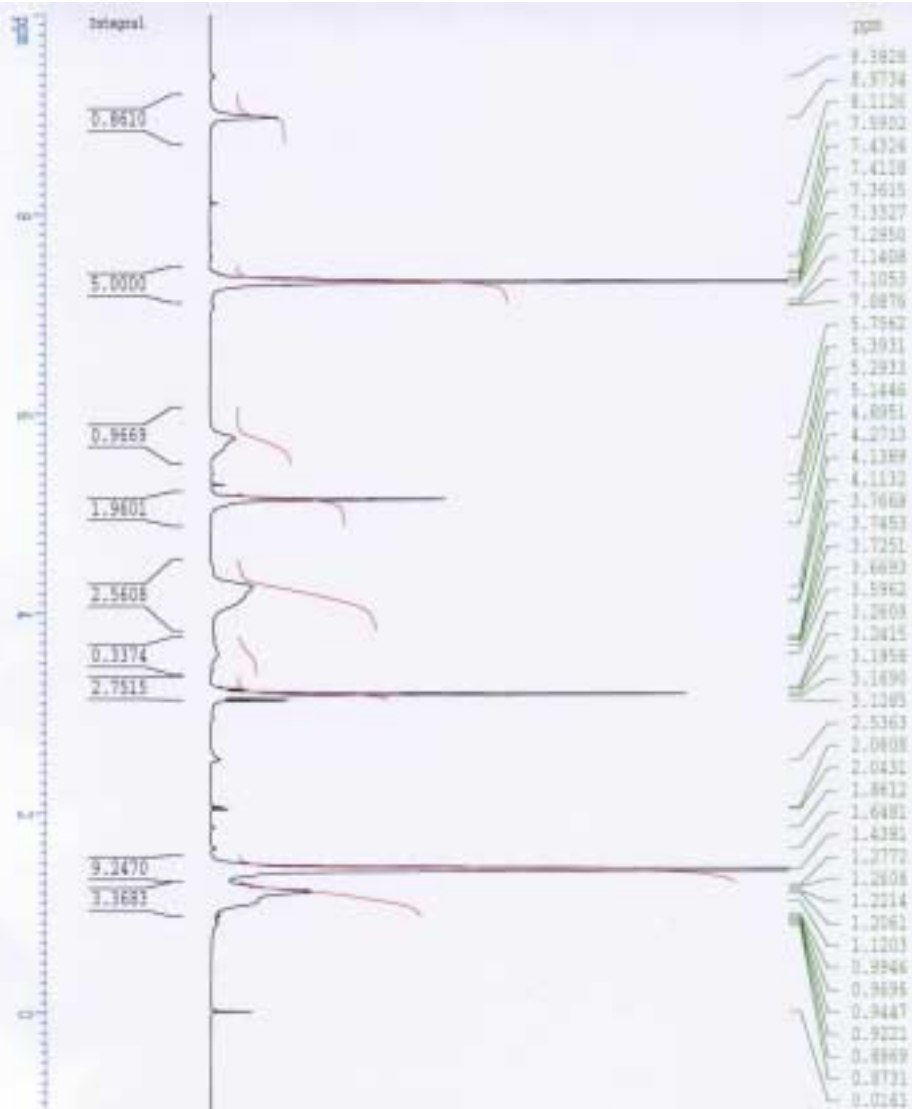

Current Data Parameters  
NAME 20c17  
EXPNO 1  
PROCNO 1  
Date\_ 20220715  
Time 18.31  
INSTRUM spect  
PROBHD 5 mm BBO-13C  
PULPROG zgpg30  
TD 65536  
SOLVENT CDCl3  
NS 12  
DS 2  
SWH 6172.879 Hz  
AQ 0.094130 Hz  
RG 1.004480 sec  
Acq 11.8  
NUC 13C  
NUC1 13C  
NUC2 13C  
P1 160.0 Hz  
PC 1.00000000 sec

===== CHANNEL f1 =====  
NUC1 13C  
P1 16.00 sec  
PL 0.00 dB  
PR 0.00 dB  
SFO1 101.62536 MHz

F2 - Processing parameters  
SI 32768  
SF 101.625360 MHz  
WDW EM  
SSB 0  
GB 0.00 Hz  
PC 1.00

1D SSB plot parameters  
F2 16.00 Hz  
F1P 16.00 Hz  
F1 2001.35 Hz  
F1P -1.888 Hz  
F2 -900.13 Hz  
F2PCN 0.55889 ppm/cm  
F2PC 145.07136 Hz/cm



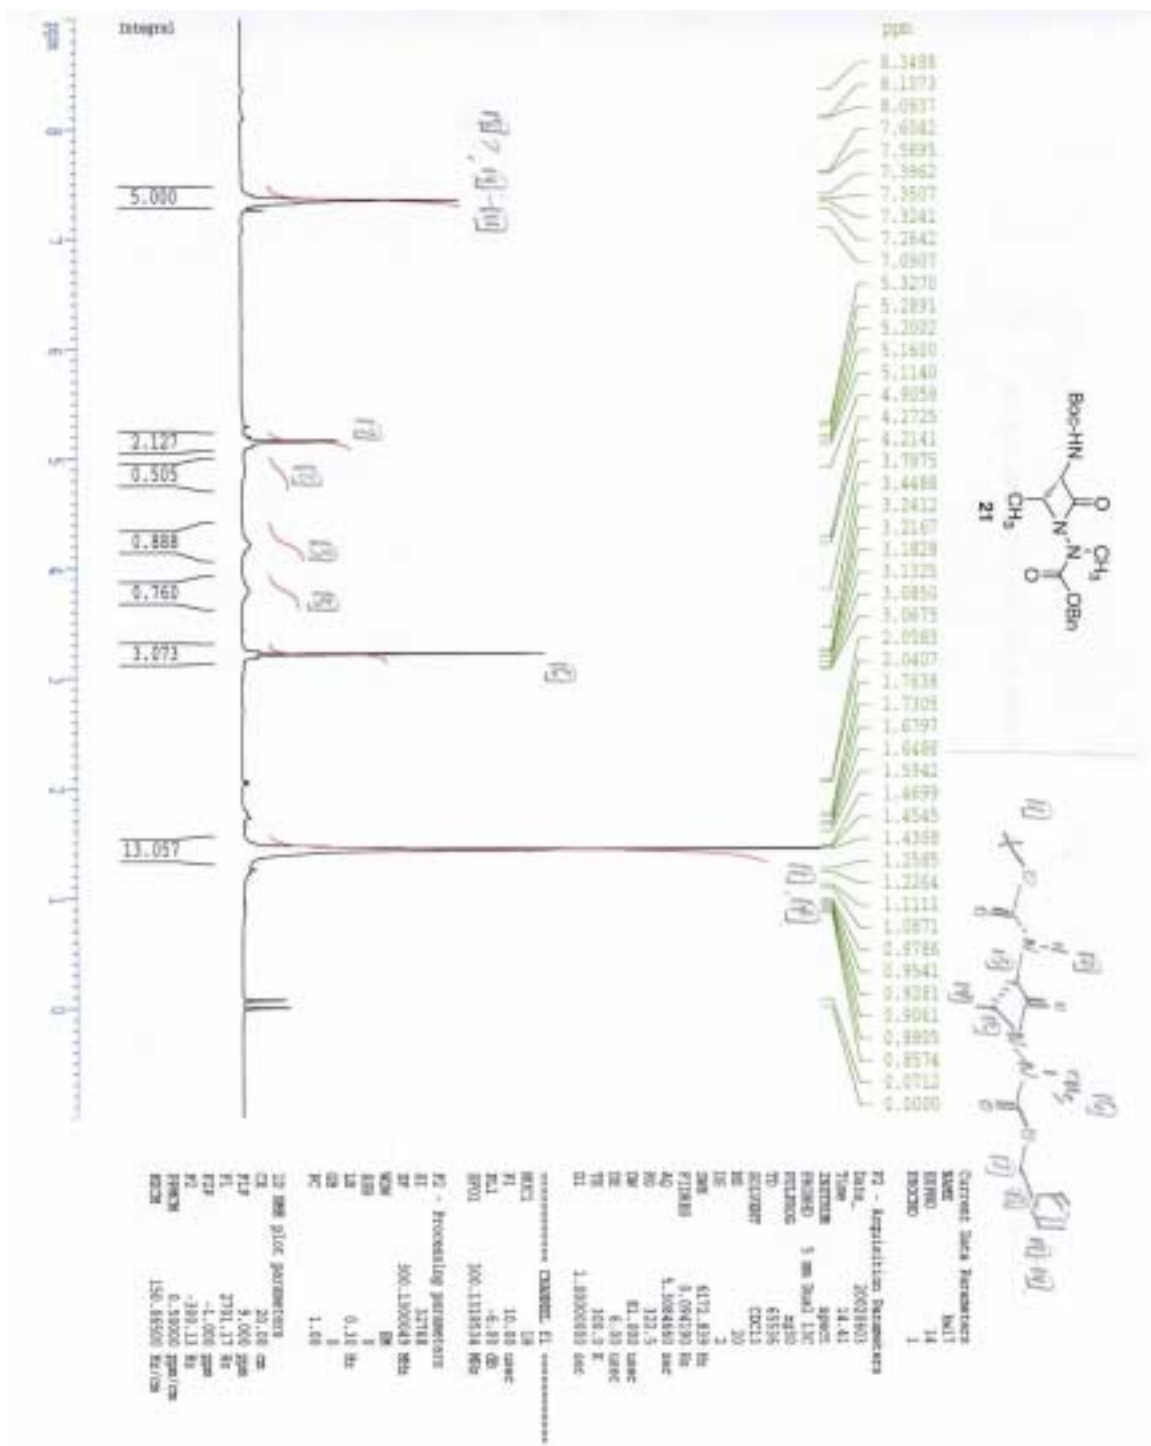

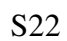

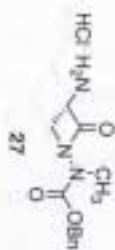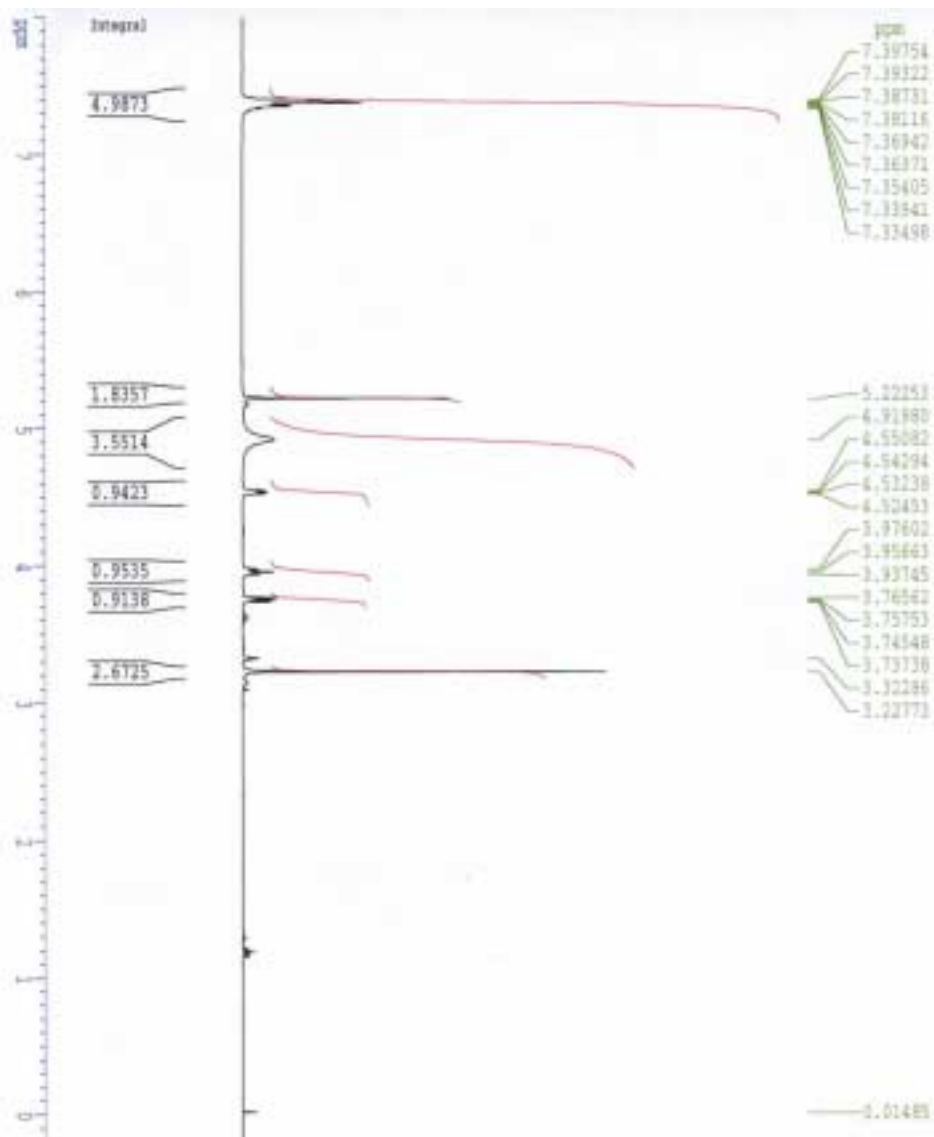

| Current Data Parameters     |             |
|-----------------------------|-------------|
| NAME                        | 27          |
| EXPNO                       | 1           |
| PROCNO                      | 1           |
| F2 - Acquisition Parameters |             |
| Date_                       | 20200312    |
| Time                        | 15.21       |
| INSTRUM                     | spect       |
| PROBHD                      | 5 mm BBO-1H |
| PULPROG                     | zgpg30      |
| TD                          | 65536       |
| TO                          | 0.0516      |
| DELTA                       | 1.0         |
| DELTA2                      | 1.0         |
| DELTA3                      | 1.0         |
| DELTA4                      | 1.0         |
| DELTA5                      | 1.0         |
| DELTA6                      | 1.0         |
| DELTA7                      | 1.0         |
| DELTA8                      | 1.0         |
| DELTA9                      | 1.0         |
| DELTA10                     | 1.0         |
| DELTA11                     | 1.0         |
| DELTA12                     | 1.0         |
| DELTA13                     | 1.0         |
| DELTA14                     | 1.0         |
| DELTA15                     | 1.0         |
| DELTA16                     | 1.0         |
| DELTA17                     | 1.0         |
| DELTA18                     | 1.0         |
| DELTA19                     | 1.0         |
| DELTA20                     | 1.0         |
| DELTA21                     | 1.0         |
| DELTA22                     | 1.0         |
| DELTA23                     | 1.0         |
| DELTA24                     | 1.0         |
| DELTA25                     | 1.0         |
| DELTA26                     | 1.0         |
| DELTA27                     | 1.0         |
| DELTA28                     | 1.0         |
| DELTA29                     | 1.0         |
| DELTA30                     | 1.0         |
| DELTA31                     | 1.0         |
| DELTA32                     | 1.0         |
| DELTA33                     | 1.0         |
| DELTA34                     | 1.0         |
| DELTA35                     | 1.0         |
| DELTA36                     | 1.0         |
| DELTA37                     | 1.0         |
| DELTA38                     | 1.0         |
| DELTA39                     | 1.0         |
| DELTA40                     | 1.0         |
| DELTA41                     | 1.0         |
| DELTA42                     | 1.0         |
| DELTA43                     | 1.0         |
| DELTA44                     | 1.0         |
| DELTA45                     | 1.0         |
| DELTA46                     | 1.0         |
| DELTA47                     | 1.0         |
| DELTA48                     | 1.0         |
| DELTA49                     | 1.0         |
| DELTA50                     | 1.0         |
| DELTA51                     | 1.0         |
| DELTA52                     | 1.0         |
| DELTA53                     | 1.0         |
| DELTA54                     | 1.0         |
| DELTA55                     | 1.0         |
| DELTA56                     | 1.0         |
| DELTA57                     | 1.0         |
| DELTA58                     | 1.0         |
| DELTA59                     | 1.0         |
| DELTA60                     | 1.0         |
| DELTA61                     | 1.0         |
| DELTA62                     | 1.0         |
| DELTA63                     | 1.0         |
| DELTA64                     | 1.0         |
| DELTA65                     | 1.0         |
| DELTA66                     | 1.0         |
| DELTA67                     | 1.0         |
| DELTA68                     | 1.0         |
| DELTA69                     | 1.0         |
| DELTA70                     | 1.0         |
| DELTA71                     | 1.0         |
| DELTA72                     | 1.0         |
| DELTA73                     | 1.0         |
| DELTA74                     | 1.0         |
| DELTA75                     | 1.0         |
| DELTA76                     | 1.0         |
| DELTA77                     | 1.0         |
| DELTA78                     | 1.0         |
| DELTA79                     | 1.0         |
| DELTA80                     | 1.0         |
| DELTA81                     | 1.0         |
| DELTA82                     | 1.0         |
| DELTA83                     | 1.0         |
| DELTA84                     | 1.0         |
| DELTA85                     | 1.0         |
| DELTA86                     | 1.0         |
| DELTA87                     | 1.0         |
| DELTA88                     | 1.0         |
| DELTA89                     | 1.0         |
| DELTA90                     | 1.0         |
| DELTA91                     | 1.0         |
| DELTA92                     | 1.0         |
| DELTA93                     | 1.0         |
| DELTA94                     | 1.0         |
| DELTA95                     | 1.0         |
| DELTA96                     | 1.0         |
| DELTA97                     | 1.0         |
| DELTA98                     | 1.0         |
| DELTA99                     | 1.0         |
| DELTA100                    | 1.0         |
| DELTA101                    | 1.0         |
| DELTA102                    | 1.0         |
| DELTA103                    | 1.0         |
| DELTA104                    | 1.0         |
| DELTA105                    | 1.0         |
| DELTA106                    | 1.0         |
| DELTA107                    | 1.0         |
| DELTA108                    | 1.0         |
| DELTA109                    | 1.0         |
| DELTA110                    | 1.0         |
| DELTA111                    | 1.0         |
| DELTA112                    | 1.0         |
| DELTA113                    | 1.0         |
| DELTA114                    | 1.0         |
| DELTA115                    | 1.0         |
| DELTA116                    | 1.0         |
| DELTA117                    | 1.0         |
| DELTA118                    | 1.0         |
| DELTA119                    | 1.0         |
| DELTA120                    | 1.0         |
| DELTA121                    | 1.0         |
| DELTA122                    | 1.0         |
| DELTA123                    | 1.0         |
| DELTA124                    | 1.0         |
| DELTA125                    | 1.0         |
| DELTA126                    | 1.0         |
| DELTA127                    | 1.0         |
| DELTA128                    | 1.0         |
| DELTA129                    | 1.0         |
| DELTA130                    | 1.0         |
| DELTA131                    | 1.0         |
| DELTA132                    | 1.0         |
| DELTA133                    | 1.0         |
| DELTA134                    | 1.0         |
| DELTA135                    | 1.0         |
| DELTA136                    | 1.0         |
| DELTA137                    | 1.0         |
| DELTA138                    | 1.0         |
| DELTA139                    | 1.0         |
| DELTA140                    | 1.0         |
| DELTA141                    | 1.0         |
| DELTA142                    | 1.0         |
| DELTA143                    | 1.0         |
| DELTA144                    | 1.0         |
| DELTA145                    | 1.0         |
| DELTA146                    | 1.0         |
| DELTA147                    | 1.0         |
| DELTA148                    | 1.0         |
| DELTA149                    | 1.0         |
| DELTA150                    | 1.0         |
| DELTA151                    | 1.0         |
| DELTA152                    | 1.0         |
| DELTA153                    | 1.0         |
| DELTA154                    | 1.0         |
| DELTA155                    | 1.0         |
| DELTA156                    | 1.0         |
| DELTA157                    | 1.0         |
| DELTA158                    | 1.0         |
| DELTA159                    | 1.0         |
| DELTA160                    | 1.0         |
| DELTA161                    | 1.0         |
| DELTA162                    | 1.0         |
| DELTA163                    | 1.0         |
| DELTA164                    | 1.0         |
| DELTA165                    | 1.0         |
| DELTA166                    | 1.0         |
| DELTA167                    | 1.0         |
| DELTA168                    | 1.0         |
| DELTA169                    | 1.0         |
| DELTA170                    | 1.0         |
| DELTA171                    | 1.0         |
| DELTA172                    | 1.0         |
| DELTA173                    | 1.0         |
| DELTA174                    | 1.0         |
| DELTA175                    | 1.0         |
| DELTA176                    | 1.0         |
| DELTA177                    | 1.0         |
| DELTA178                    | 1.0         |
| DELTA179                    | 1.0         |
| DELTA180                    | 1.0         |
| DELTA181                    | 1.0         |
| DELTA182                    | 1.0         |
| DELTA183                    | 1.0         |
| DELTA184                    | 1.0         |
| DELTA185                    | 1.0         |
| DELTA186                    | 1.0         |
| DELTA187                    | 1.0         |
| DELTA188                    | 1.0         |
| DELTA189                    | 1.0         |
| DELTA190                    | 1.0         |
| DELTA191                    | 1.0         |
| DELTA192                    | 1.0         |
| DELTA193                    | 1.0         |
| DELTA194                    | 1.0         |
| DELTA195                    | 1.0         |
| DELTA196                    | 1.0         |
| DELTA197                    | 1.0         |
| DELTA198                    | 1.0         |
| DELTA199                    | 1.0         |
| DELTA200                    | 1.0         |
| DELTA201                    | 1.0         |
| DELTA202                    | 1.0         |
| DELTA203                    | 1.0         |
| DELTA204                    | 1.0         |
| DELTA205                    | 1.0         |
| DELTA206                    | 1.0         |
| DELTA207                    | 1.0         |
| DELTA208                    | 1.0         |
| DELTA209                    | 1.0         |
| DELTA210                    | 1.0         |
| DELTA211                    | 1.0         |
| DELTA212                    | 1.0         |
| DELTA213                    | 1.0         |
| DELTA214                    | 1.0         |
| DELTA215                    | 1.0         |
| DELTA216                    | 1.0         |
| DELTA217                    | 1.0         |
| DELTA218                    | 1.0         |
| DELTA219                    | 1.0         |
| DELTA220                    | 1.0         |
| DELTA221                    | 1.0         |
| DELTA222                    | 1.0         |
| DELTA223                    | 1.0         |
| DELTA224                    | 1.0         |
| DELTA225                    | 1.0         |
| DELTA226                    | 1.0         |
| DELTA227                    | 1.0         |
| DELTA228                    | 1.0         |
| DELTA229                    | 1.0         |
| DELTA230                    | 1.0         |
| DELTA231                    | 1.0         |
| DELTA232                    | 1.0         |
| DELTA233                    | 1.0         |
| DELTA234                    | 1.0         |
| DELTA235                    | 1.0         |
| DELTA236                    | 1.0         |
| DELTA237                    | 1.0         |
| DELTA238                    | 1.0         |
| DELTA239                    | 1.0         |
| DELTA240                    | 1.0         |
| DELTA241                    | 1.0         |
| DELTA242                    | 1.0         |
| DELTA243                    | 1.0         |
| DELTA244                    | 1.0         |
| DELTA245                    | 1.0         |
| DELTA246                    | 1.0         |
| DELTA247                    | 1.0         |
| DELTA248                    | 1.0         |
| DELTA249                    | 1.0         |
| DELTA250                    | 1.0         |
| DELTA251                    | 1.0         |
| DELTA252                    | 1.0         |
| DELTA253                    | 1.0         |
| DELTA254                    | 1.0         |
| DELTA255                    | 1.0         |
| DELTA256                    | 1.0         |
| DELTA257                    | 1.0         |
| DELTA258                    | 1.0         |
| DELTA259                    | 1.0         |
| DELTA260                    | 1.0         |
| DELTA261                    | 1.0         |
| DELTA262                    | 1.0         |
| DELTA263                    | 1.0         |
| DELTA264                    | 1.0         |
| DELTA265                    | 1.0         |
| DELTA266                    | 1.0         |
| DELTA267                    | 1.0         |
| DELTA268                    | 1.0         |
| DELTA269                    | 1.0         |
| DELTA270                    | 1.0         |
| DELTA271                    | 1.0         |
| DELTA272                    | 1.0         |
| DELTA273                    | 1.0         |
| DELTA274                    | 1.0         |
| DELTA275                    | 1.0         |
| DELTA276                    | 1.0         |
| DELTA277                    | 1.0         |
| DELTA278                    | 1.0         |
| DELTA279                    | 1.0         |
| DELTA280                    | 1.0         |
| DELTA281                    | 1.0         |
| DELTA282                    | 1.0         |
| DELTA283                    | 1.0         |
| DELTA284                    | 1.0         |
| DELTA285                    | 1.0         |
| DELTA286                    | 1.0         |
| DELTA287                    | 1.0         |
| DELTA288                    | 1.0         |
| DELTA289                    | 1.0         |
| DELTA290                    | 1.0         |
| DELTA291                    | 1.0         |
| DELTA292                    | 1.0         |
| DELTA293                    | 1.0         |
| DELTA294                    | 1.0         |
| DELTA295                    | 1.0         |
| DELTA296                    | 1.0         |
| DELTA297                    | 1.0         |
| DELTA298                    | 1.0         |
| DELTA299                    | 1.0         |
| DELTA300                    | 1.0         |
| DELTA301                    | 1.0         |
| DELTA302                    | 1.0         |
| DELTA303                    | 1.0         |
| DELTA304                    | 1.0         |
| DELTA305                    | 1.0         |
| DELTA306                    | 1.0         |
| DELTA307                    | 1.0         |
| DELTA308                    | 1.0         |
| DELTA309                    | 1.0         |
| DELTA310                    | 1.0         |
| DELTA311                    | 1.0         |
| DELTA312                    | 1.0         |
| DELTA313                    | 1.0         |
| DELTA314                    | 1.0         |
| DELTA315                    | 1.0         |
| DELTA316                    | 1.0         |
| DELTA317                    | 1.0         |
| DELTA318                    | 1.0         |
| DELTA319                    | 1.0         |
| DELTA320                    | 1.0         |
| DELTA321                    | 1.0         |
| DELTA322                    | 1.0         |
| DELTA323                    | 1.0         |
| DELTA324                    | 1.0         |
| DELTA325                    | 1.0         |
| DELTA326                    | 1.0         |
| DELTA327                    | 1.0         |
| DELTA328                    | 1.0         |
| DELTA329                    | 1.0         |
| DELTA330                    | 1.0         |
| DELTA331                    | 1.0         |
| DELTA332                    | 1.0         |
| DELTA333                    | 1.0         |
| DELTA334                    | 1.0         |
| DELTA335                    | 1.0         |
| DELTA336                    | 1.0         |
| DELTA337                    | 1.0         |
| DELTA338                    | 1.0         |
| DELTA339                    | 1.0         |
| DELTA340                    | 1.0         |
| DELTA341                    | 1.0         |
| DELTA342                    | 1.0         |
| DELTA343                    | 1.0         |
| DELTA344                    | 1.0         |
| DELTA345                    | 1.0         |
| DELTA346                    | 1.0         |
| DELTA347                    | 1.0         |
| DELTA348                    | 1.0         |
| DELTA349                    | 1.0         |
| DELTA350                    | 1.0         |
| DELTA351                    | 1.0         |
| DELTA352                    | 1.0         |
| DELTA353                    | 1.0         |
| DELTA354                    | 1.0         |
| DELTA355                    | 1.0         |
| DELTA356                    | 1.0         |
| DELTA357                    | 1.0         |
| DELTA358                    | 1.0         |
| DELTA359                    | 1.0         |
| DELTA360                    | 1.0         |
| DELTA361                    | 1.0         |
| DELTA362                    | 1.0         |
| DELTA363                    | 1.0         |
| DELTA364                    | 1.0         |
| DELTA365                    | 1.0         |
| DELTA366                    | 1.0         |
| DELTA367                    | 1.0         |
| DELTA368                    | 1.0         |
| DELTA369                    | 1.0         |
| DELTA370                    | 1.0         |
| DELTA371                    | 1.0         |
| DELTA372                    | 1.0         |
| DELTA373                    | 1.0         |
| DELTA374                    | 1.0         |
| DELTA375                    | 1.0         |
| DELTA376                    | 1.0         |
| DELTA377                    | 1.0         |
| DELTA378                    | 1.0         |
| DELTA379                    | 1.0         |
| DELTA380                    | 1.0         |
| DELTA381                    | 1.0         |
| DELTA382                    | 1.0         |
| DELTA383                    | 1.0         |
| DELTA384                    | 1.0         |
| DELTA385                    | 1.0         |
| DELTA386                    | 1.0         |
| DELTA387                    | 1.0         |
| DELTA388                    | 1.0         |
| DELTA389                    | 1.0         |
| DELTA390                    | 1.0         |
| DELTA391                    | 1.0         |
| DELTA392                    | 1.0         |
| DELTA393                    | 1.0         |
| DELTA394                    | 1.0         |
| DELTA395                    | 1.0         |
| DELTA396                    | 1.0         |
| DELTA397                    | 1.0         |
| DELTA398                    | 1.0         |
| DELTA399                    | 1.0         |
| DELTA400                    | 1.0         |
| DELTA401                    | 1.0         |
| DELTA402                    | 1.0         |
| DELTA403                    | 1.0         |
| DELTA404                    | 1.0         |
| DELTA405                    | 1.0         |
| DELTA406                    | 1.0         |
| DELTA407                    | 1.0         |
| DELTA408                    | 1.0         |
| DELTA409                    | 1.0         |
| DELTA410                    | 1.0         |
| DELTA411                    | 1.0         |
| DELTA412                    | 1.0         |
| DELTA413                    | 1.0         |
| DELTA414                    | 1.0         |
| DELTA415                    | 1.0         |
| DELTA416                    | 1.0         |
| DELTA417                    | 1.0         |
| DELTA418                    | 1.0         |
| DELTA419                    | 1.0         |
| DELTA420                    | 1.0         |
| DELTA421                    | 1.0         |
| DELTA422                    | 1.0         |
| DELTA423                    | 1.0         |
| DELTA424                    | 1.0         |
| DELTA425                    | 1.0         |
| DELTA426                    | 1.0         |
| DELTA427                    | 1.0         |
| DELTA428                    | 1.0         |
| DELTA429                    | 1.0         |
| DELTA430                    | 1.0         |
| DELTA431                    | 1.0         |
| DELTA432                    | 1.0         |
| DELTA433                    | 1.0         |
| DELTA434                    | 1.0         |
| DELTA435                    | 1.0         |
| DELTA436                    | 1.0         |
| DELTA437                    | 1.0         |
| DELTA438                    | 1.0         |
| DELTA439                    | 1.0         |
| DELTA440                    | 1.0         |
| DELTA441                    | 1.0         |
| DELTA442                    | 1.0         |
| DELTA443                    | 1.0         |
| DELTA444                    | 1.0         |
| DELTA445                    | 1.0         |
| DELTA446                    | 1.0         |
| DELTA447                    | 1.0         |
| DELTA448                    | 1.0         |
| DELTA449                    | 1.0         |
| DELTA450                    | 1.0         |
| DELTA451                    | 1.0         |
| DELTA452                    | 1.0         |
| DELTA453                    | 1.0         |
| DELTA454                    | 1.0         |
| DELTA455                    | 1.0         |
| DELTA456                    | 1.0         |
| DELTA457                    | 1.0         |
| DELTA458                    | 1.0         |
| DELTA459                    | 1.0         |
| DELTA460                    | 1.0         |
| DELTA461                    | 1.0         |
| DELTA462                    | 1.0         |
| DELTA463                    | 1.0         |
| DELTA464                    | 1.0         |
| DELTA465                    | 1.0         |
| DELTA466                    | 1.0         |
| DELTA467                    | 1.0         |
| DELTA468                    | 1.0         |
| DELTA469                    | 1.0         |
| DELTA470                    | 1.0         |
| DELTA471                    | 1.0         |
| DELTA472                    | 1.0         |
| DELTA473                    | 1.0         |
| DELTA474                    | 1.0         |
| DELTA475                    |             |

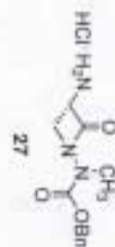S24



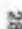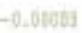

20.65 cm  
 8.765 gpm  
 1061.67 Hz  
 -8.243 gpm  
 -72.98 Hz  
 0.42216 gpm/cm  
 126.702216 Hz/cm



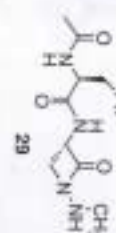S27

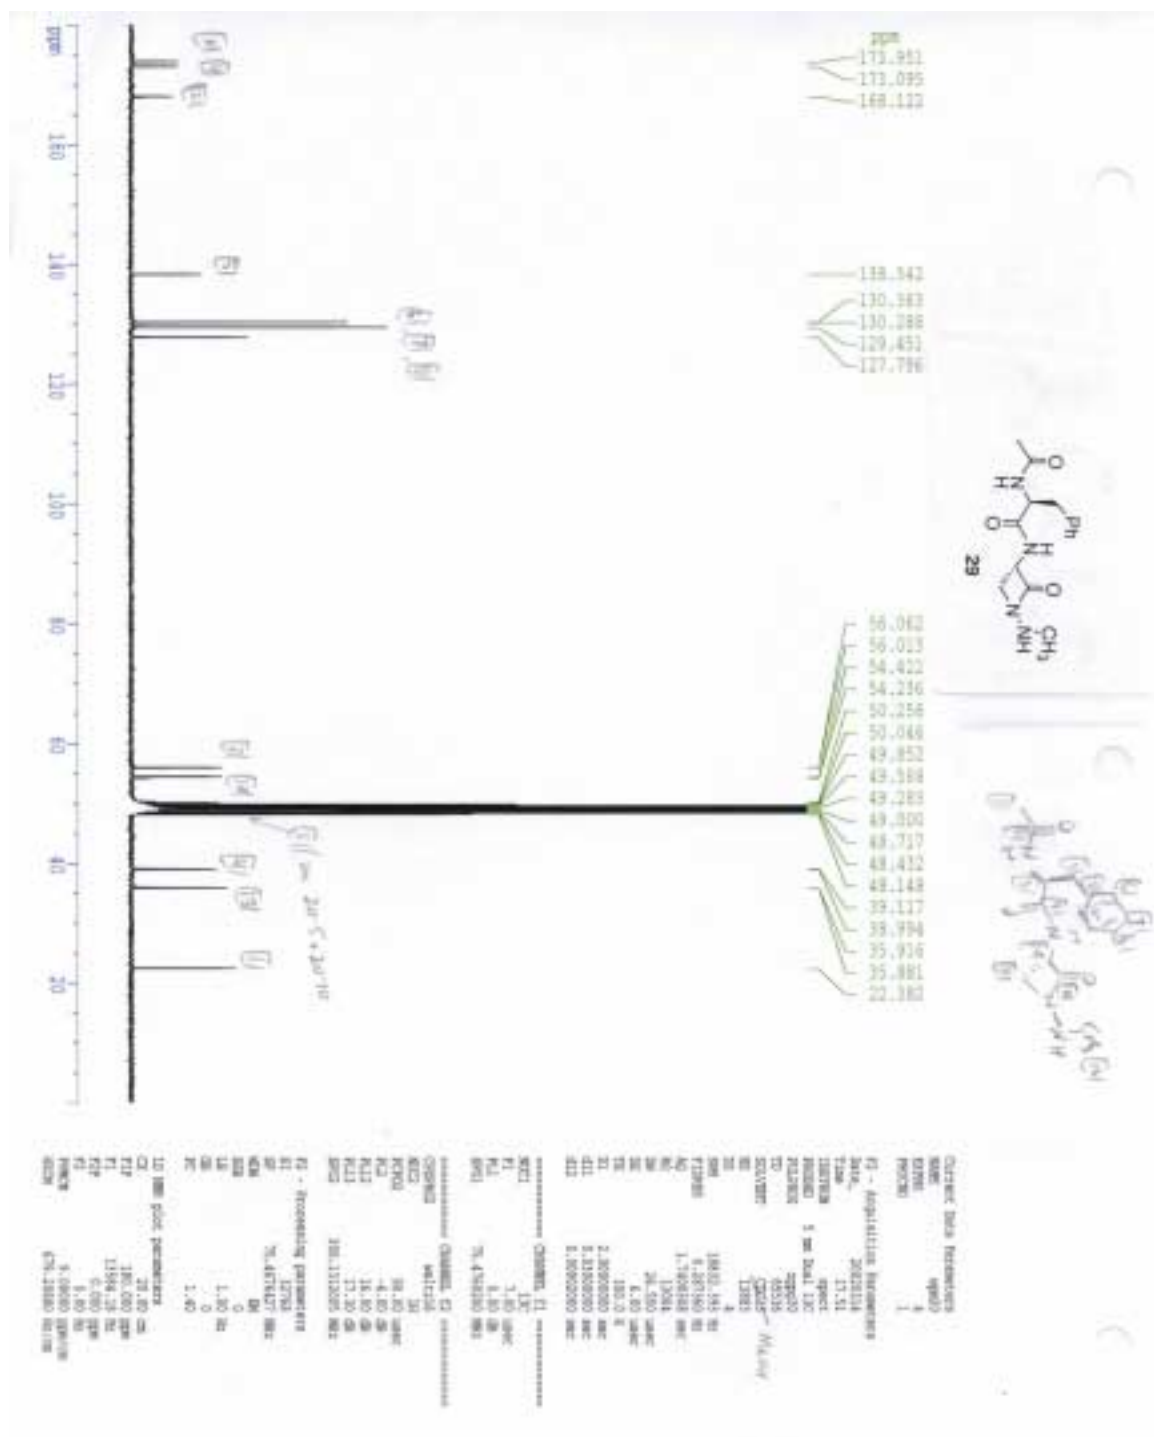

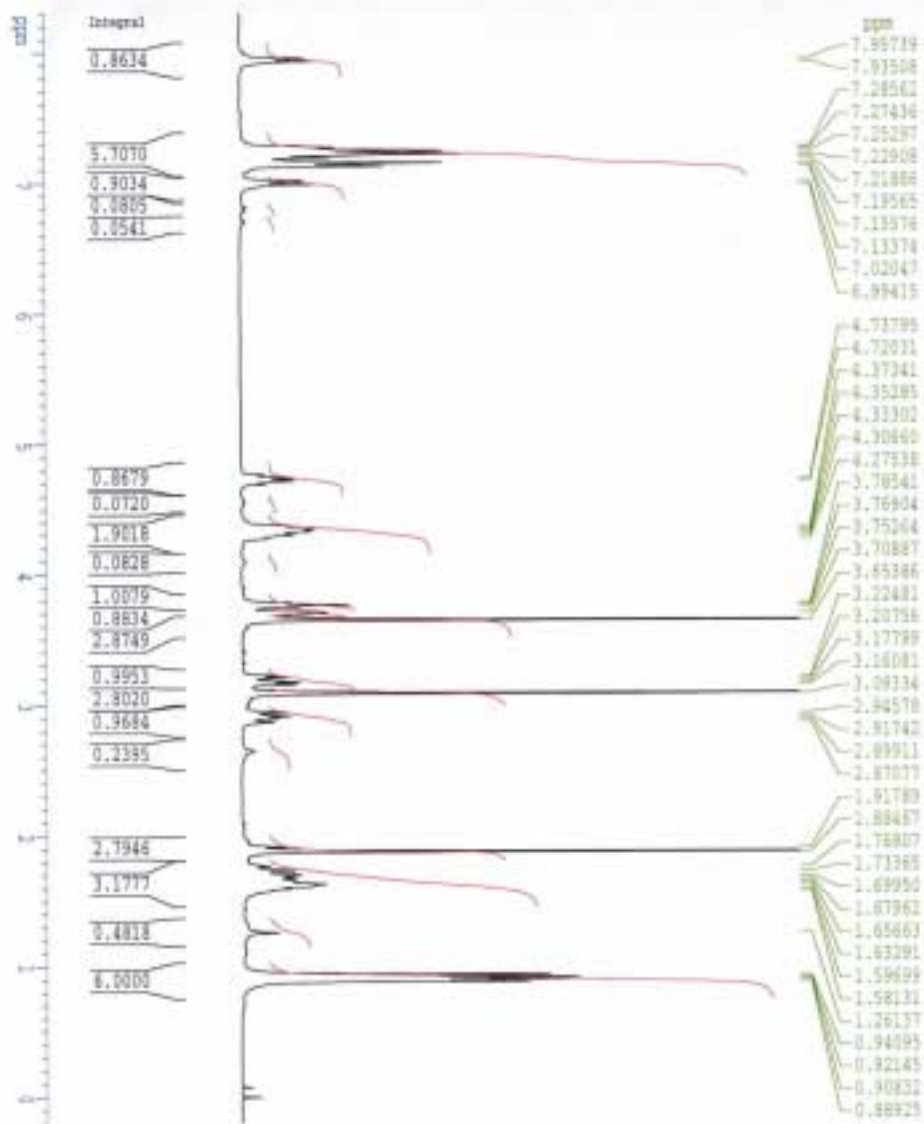

Current Data Parameters  
NAME:   
EXPNO: 118  
PROCNO: 1  
F2 - Acquisition Parameters  
Date\_ : 20111221  
Time: 11.35  
INSTRUM: spect  
PROBHD: 5 mm QNP 1H  
PULPROG: zgpg30  
TD: 65536  
SOLVENT: CDCl3  
NS: 16  
DS: 2  
SWH: 6172.619 Hz  
FIDRES: 0.394136 Hz  
AQ: 9.1386668 sec  
RG: 71.8  
RM: 81.000 Hz  
DE: 4.00 Hz  
TE: 300.0 K  
SI: 1.00000000 sec

===== CHANNEL f1 =====  
NUC1: 1H  
P1: 12.00 Hz  
PL1: -4.00 dB  
RF01: 399.1318534 MHz

F2 - Processing parameters  
SI: 17368  
SF: 399.1318534 MHz  
WDW: EM  
SSB: 0  
LB: 8.30 Hz  
GB: 0  
PC: 1.30

===== 1D NMR plot parameters =====  
SI: 17368  
SF: 399.1318534 MHz  
WDW: EM  
SSB: 0  
LB: 8.30 Hz  
GB: 0  
PC: 1.30

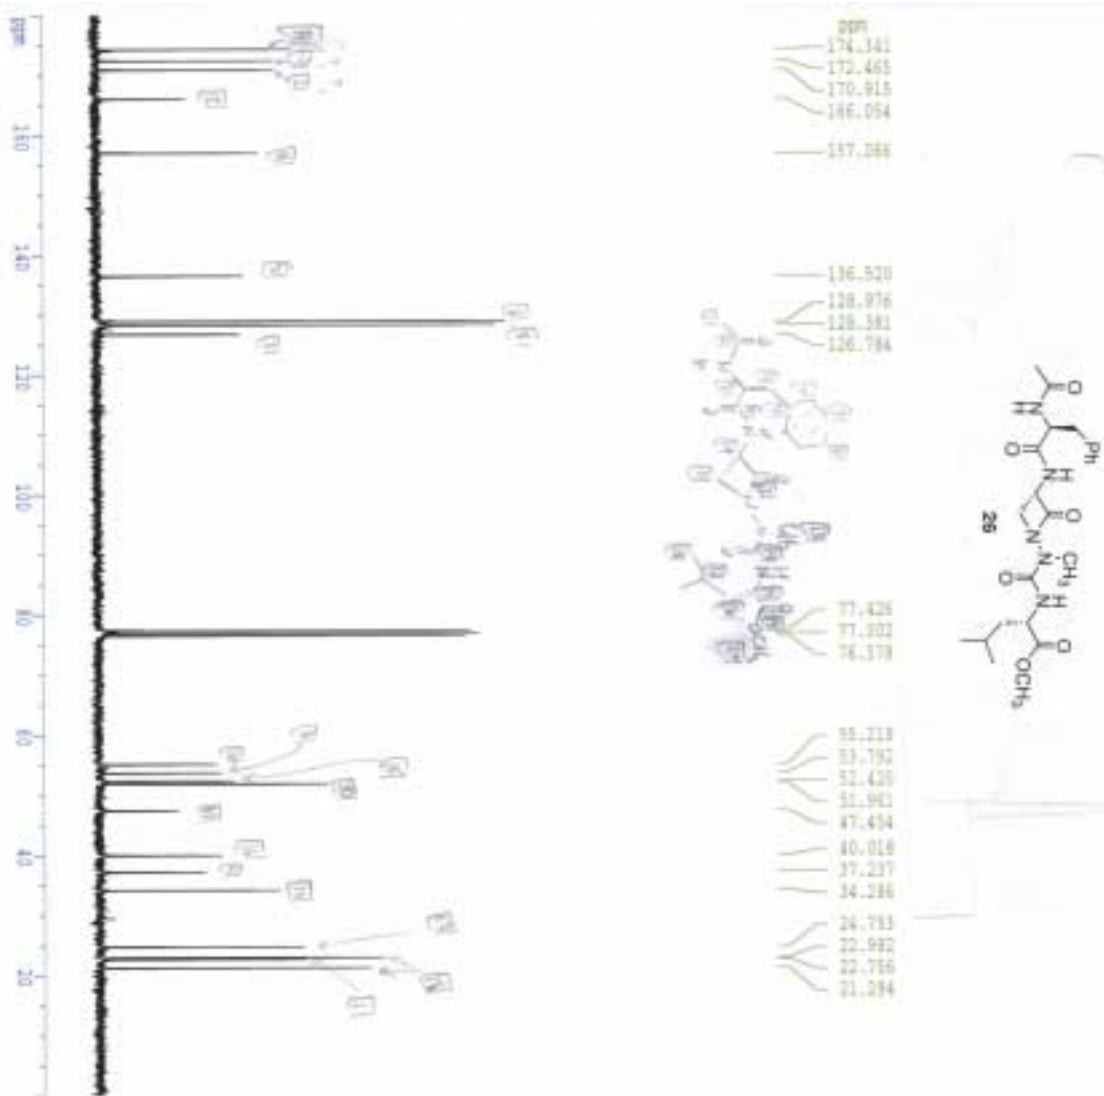

Supplement: Supplementary file 1 [file 5786688]
